## Work characteristics and large joint osteoarthritis

1 Associations between work characteristics and large joint osteoarthritis: a cross-sectional

2 study of 285,947 UK Biobank participants

3 Hashmi A BSc<sup>1</sup>, Scott S BSc<sup>1</sup>, Jung M PhD<sup>1,2</sup>, Meng Q-J MD PhD<sup>3</sup>, Tobias JH MD PhD<sup>1,2</sup>,

4 Beynon RA PhD<sup>1,2\*</sup>, Faber BG MBBS PhD<sup>1,2\*</sup>

5 \* Joint Senior authors

6

7 1) Musculoskeletal Research Unit, University of Bristol, UK

8 2) Medical Research Council Integrative Epidemiology Unit, University of Bristol, UK

9 3) Wellcome Centre for Cell-Matrix Research, Faculty of Biology, Medicine and Health,  
10 University of Manchester, UK

11

12 Corresponding Author

13 Dr Benjamin Faber

14 Musculoskeletal Research Unit

15 Learning and Research Building

16 Southmead Hospital, Bristol BS10 5NB

17 ben.faber@bristol.ac.uk

18

19 Running Title: Work characteristics and large joint osteoarthritis

20 Key words: epidemiology, knee osteoarthritis, hip osteoarthritis, occupational risk, shift

21 work, physical work

22

## Work characteristics and large joint osteoarthritis

### 23 Abstract

#### 24 Objectives

25 Shift work-induced circadian rhythm disruption has been identified as a risk factor for specific  
26 diseases. Additionally, physically demanding work has been linked to osteoarthritis. This study  
27 investigated the independent associations of shift work and physical work with risk of large  
28 joint osteoarthritis.

#### 29 Design

30 UK Biobank participants completed questionnaires detailing their employment status,  
31 including shift work, night shifts, heavy manual work and prolonged non-sedentary work.  
32 Responses were categorised into binary and categorical variables. Knee and hip osteoarthritis  
33 diagnoses were extracted from hospital records and osteoarthritis (any site) was self-reported.  
34 Logistic regression models, adjusted for age, sex, BMI, Townsend Deprivation Index and other  
35 work factors, were used to investigate the relationships between work characteristics and  
36 osteoarthritis outcomes.

#### 37 Results

38 This study included 285,947 participants (mean age 52.7 years; males 48.0%). Shift work and  
39 night shifts were associated with knee osteoarthritis (fully adjusted OR: 1.12 [95% CI:1.07-  
40 1.17] and 1.12 [1.04-1.20], respectively), and self-reported osteoarthritis but there was little  
41 evidence of an association with hip osteoarthritis (1.01 [0.95-1.08] and 1.03 [0.93-1.14]).  
42 Heavy manual work and prolonged non-sedentary work were associated with increased risk of  
43 all osteoarthritis outcomes.

#### 44 Conclusions

### Work characteristics and large joint osteoarthritis

45 Shift work showed independent associations with knee osteoarthritis and self-reported  
46 osteoarthritis but not hip osteoarthritis, suggesting circadian rhythm dysfunction may play a  
47 role in knee osteoarthritis pathogenesis. Heavy manual work and prolonged non-sedentary  
48 work were associated with all outcomes, with stronger associations in knee osteoarthritis,  
49 possibly reflecting the knee's higher susceptibility to biomechanical stress. Further research is  
50 needed to explore workplace interventions for reducing these risks.

## Work characteristics and large joint osteoarthritis

### 51 Introduction

52 Osteoarthritis ranks as the 7<sup>th</sup> leading cause of years lived with disability worldwide,  
53 particularly in those aged over 70, with the knee and hip being the most affected joints (1, 2).  
54 The global disease burden is increasing due to an upsurge in prevalence, driven by an aging  
55 demographic and a growing incidence of obesity (3). The identification of risk factors has the  
56 potential to alleviate this burden by helping prevent disease onset and progression. Given that  
57 individuals in the UK spend an average of 1532 hours at work annually (4), the workplace  
58 environment emerges as an important area for uncovering such risk factors. Notably, shift  
59 work-induced circadian disruption has received growing interest, with over 20% of European  
60 workers engaged in shift work in 2015 (5).

61

62 Circadian (24-hourly) rhythm has been shown to play a role in maintaining joint tissue  
63 homeostasis (6). Circadian rhythm is generated by a network of clock genes and proteins that  
64 rhythmically regulate their own expression and that of other tissue-specific target genes. This  
65 regulation occurs through a transcription-translation feedback loop (7). Notably, genes  
66 involved in extracellular matrix turnover and chondrocyte differentiation demonstrate circadian  
67 rhythmicity, with clock genes implicated in this regulation (8). In human osteoarthritis models,  
68 disruptions in clock gene function have been linked to increased expression of cartilage  
69 catabolic genes (9, 10), while environmental disturbances to circadian rhythms have been  
70 shown to induce osteoarthritis-like pathological alterations in the mouse knee joint (11).

71

72 Shift work is a known disruptor of circadian rhythms, by causing a misalignment in the sleep-  
73 wake cycle, raising the possibility it might influence osteoarthritis risk (12). Retrospective  
74 cohort studies of retired Chinese workers have revealed a positive association between shift

## Work characteristics and large joint osteoarthritis

75 work and risk of osteoarthritis, compared with daytime workers (13, 14). However, the  
76 generalisability of these findings to other populations may be limited. Of note, in the UK, both  
77 men and women engaging in night shift work are more likely to perform physically demanding  
78 tasks (15), which are a known risk factor for large joint osteoarthritis (16-18) .Therefore, when  
79 exploring the association between shift work and osteoarthritis, it is important to consider the  
80 influence of work physicality as a possible confounding factor.

81

82 This study aimed to investigate the relationships between work characteristics and the  
83 prevalence of osteoarthritis within the UK Biobank (UKB) study. Specifically, our objectives  
84 were to explore the independent associations between shift work and the prevalence of hospital-  
85 diagnosed knee and hip osteoarthritis, as well as self-reported osteoarthritis, whilst considering  
86 the influence of work physicality. In addition, we sought to identify any sex differences in these  
87 relationships. By addressing these questions, our study aimed to offer insights into the  
88 associations between these work characteristics and joint health, with the goal of informing the  
89 development of future interventions and policies concerning the design of employment  
90 patterns, to alleviate the burden of osteoarthritis

## Work characteristics and large joint osteoarthritis

### 91 **Materials and Methods**

#### 92 **Population**

93 UKB is a longitudinal, population-based cohort study, that commenced in 2006, recruiting over  
94 500,000 individuals aged 40-69 from across the UK. Participants underwent extensive physical  
95 and lifestyle assessment, including questionnaires on socio-demographic and environmental  
96 factors. Consent was given for linkage to electronic healthcare records, which enabled  
97 participant follow-up (19). UKB obtained ethical approval from the National Information  
98 Governance Board for Health and Social Care and Northwest Multi-centre Research Ethics  
99 Committee (11/NW/0382). All participants provided informed consent for the collection and  
100 use of their data.

101

#### 102 **Self-reported Outcomes**

103 Self-reported diagnoses of non-site-specific osteoarthritis were obtained through a  
104 questionnaire administered at baseline and during three follow-up periods. Participants were  
105 asked: *“Have you ever been told by a doctor that you have had osteoarthritis affecting one or  
106 more joints (e.g. hip, knee, shoulder)?”*. Participants could respond with “Yes”, “No”, “Do not  
107 know,” or “Prefer not to answer”. A binary variable was created by coding participants as “1”  
108 if they answered yes at any timepoint and as “0” if they did not answer yes at any point. Those  
109 who did not know or preferred not to answer were excluded from analyses.

110

#### 111 **Diagnosed Outcomes**

112 Hospital diagnosed knee osteoarthritis and hip osteoarthritis cases were identified through  
113 linkage to hospital episode statistics (HES), which use the International Classification of

## Work characteristics and large joint osteoarthritis

114 Diseases (ICD) 9<sup>th</sup> and 10<sup>th</sup> revision codes. Specifically, cases were identified using codes  
115 adopted from Zengini et al. (20) (Supplementary Table 1). The linkage of all UKB participants  
116 was conducted both prospectively and retrospectively at baseline. Records were available from  
117 1st April 1997, and the data was downloaded from the UKB Showcase in August 2023,  
118 encompassing information until the end of October 2022.

119

### 120 Exposures

121 Participants were asked about their work patterns at baseline and three follow-up periods,  
122 through a self-reported touchscreen questionnaire. This included “*Does your work involve shift*  
123 *work?*”, defined as a work schedule outside the routine daytime working hours of 09:00 to  
124 17:00. Participants responded according to a four-point Likert scale: “Never/Rarely”,  
125 “Sometimes”, “Usually” or “Always”. Those who answered sometimes, usually or always were  
126 subsequently asked “*Does your work involve night shifts?*”, defined as a work schedule that  
127 involves working during the regular sleeping hours, for example from 00:00 to 06:00.  
128 Participants could answer according to the same four responses. For work physicality,  
129 participants were asked, “*Does your work involve heavy manual or physical work?*” and “*Does*  
130 *your work involve walking or standing for most of the time?*”. Heavy manual work was defined  
131 as employment involving the use of heavy objects and tools. Prolonged non-sedentary work  
132 was defined as work that requires prolonged periods of walking or standing. Again, responses  
133 followed the same four-category scale.

134

135 Categorical variables for the work exposures were created and coded: (1) never/rarely, (2)  
136 sometimes, (3) usually or (4) always. From this, a binary exposure variable was generated: (0)  
137 never/rarely and sometimes or (1) usually and always. Questionnaire data spanning the four

## Work characteristics and large joint osteoarthritis

138 timepoints was examined but considering most respondents only answered once, this  
139 information was collapsed into one set of variables. If a participant answered more than once,  
140 their highest response was selected. Those who did not know or preferred not to answer were  
141 excluded from analyses.

142

### 143 [Statistical Analysis](#)

144 Descriptive statistics summarised the baseline population characteristics, presented as means,  
145 standard deviations (SDs) and ranges for continuous variables and as frequencies for  
146 categorical and binary variables. Logistic regression models examined the associations  
147 between each work exposure (shift work, night shifts, heavy manual work and prolonged non-  
148 sedentary work) and each osteoarthritis outcome (knee, hip and self-reported). Results are  
149 shown as odds ratios (OR) with 95% confidence intervals (CIs). Directed acyclic graphs guided  
150 the a priori selection of covariates for adjustment, specifically age, sex, body mass index (BMI)  
151 and Townsend Deprivation Index (TDI). The TDI is a postcode-based measure of  
152 socioeconomic deprivation, with a higher measure indicating increased socioeconomic  
153 deprivation (21). Models of shift work exposures were adjusted accordingly: model (1)  
154 unadjusted, (2) age and sex, (3) age, sex, BMI and TDI, (4) age, sex, BMI, TDI and both work  
155 physicality variables. Models using work physicality exposures were similarly adjusted except  
156 for model 4, which was adjusted for age, sex, BMI, TDI, shift work and the other work  
157 physicality variable. Age, BMI and TDI were incorporated into the models as continuous  
158 variables. Shift work and night shifts were not mutually adjusted due to direct classification  
159 overlap. The effect of exposure frequency on risk of osteoarthritis was explored using  
160 categorical work exposure variables, which used the “never” group as the comparator.  
161 Combined sex analyses were supplemented by sex-stratified analyses. Sex interactions terms



## Work characteristics and large joint osteoarthritis

162 were also examined. All statistical analyses were conducted using STATA version 18

163 (StataCorp, College Station, TX, USA).

## Work characteristics and large joint osteoarthritis

### 164 Results

#### 165 Baseline characteristics

166 In total, 285,947 participants (mean age 52.7, SD: 7.1 years, range: 38-71 years), were included  
167 in the analysis (Table 1). There were 137,154 (48.0%) males and 148,793 (52.0%) females.  
168 Knee osteoarthritis and hip osteoarthritis were diagnosed in 18,578 (6.5%) and 10,698 (3.7%)  
169 individuals, respectively. Non-site-specific osteoarthritis was self-reported in 16,407 (5.7%) of  
170 individuals. Knee osteoarthritis was more common among males with a prevalence of 9,623  
171 (7.0%) compared to females (8,955 [6.0%]). Hip osteoarthritis and self-reported osteoarthritis  
172 were more common among females with a prevalence of 5,895 (4.0%) and 10,018 (6.7%). In  
173 males, 4,803 (3.5%) had hip osteoarthritis and 6,389 (4.7%) had self-reported osteoarthritis.  
174 Shift work, nights shifts and heavy manual work were more commonly reported among males,  
175 whereas prolonged non-sedentary work had a similar prevalence among males and females  
176 (Table1).

177

#### 178 Knee Osteoarthritis

179 Combined sex analyses, unadjusted for work physicality, demonstrated consistent associations  
180 between binary shift work and knee osteoarthritis (model 1: odds ratio (OR) 1.31 [95% CI:  
181 1.25-1.37], model 2: 1.42 [1.36-1.49], model 3: 1.29 [1.23-1.35]). A similar trend was seen for  
182 night shifts (Table 2, Supplementary Figure 1). In sex stratified analyses, the effect estimates  
183 were comparable between males and females and the inclusion of a sex interaction term in the  
184 models did not provide strong evidence of an interaction ( $p < 0.1$ ), except in the unadjusted shift  
185 work model (Table 2, Supplementary Figure 1). Work physicality exposures exhibited stronger  
186 associations than the shift work exposures, with the point estimates for heavy manual work  
187 (model 1: OR 1.55 [95% CI: 1.49-1.61], model 2: 1.59 [1.53-1.65], model 3: 1.58 [1.52-1.64])

## Work characteristics and large joint osteoarthritis

188 slightly higher than prolonged non-sedentary work (model 1: 1.48 [1.44-1.53], model 2: 1.46  
189 [1.41-1.50], model 3: 1.48 [1.43-1.52]). For both work physicality exposures, sex interactions  
190 were seen in all models and sex stratification indicated that heavy manual work and prolonged  
191 non-sedentary work were more strongly associated with knee osteoarthritis in males compared  
192 to females (Table 2, Supplementary Figure 1).

193 Mutual adjustment (model 4) attenuated the associations between binary work characteristics  
194 and knee osteoarthritis. In combined sex analyses shift work and night shifts continued to be  
195 associated with knee osteoarthritis (shift work: OR 1.12 [95% CI: 1.07-1.17], night shifts: 1.12  
196 [1.04-1.20]). Unlike models 1-3, sex interactions were noted in the fully adjusted models for  
197 shift work and night shifts (Table 2). After sex stratification, night shifts remained associated  
198 with knee osteoarthritis in males (1.15 [1.05-1.26]) but weakly in females (1.09 [0.97-1.23])  
199 Similarly, in combined sex analyses, work physicality remained strongly associated with knee  
200 osteoarthritis in the mutually adjusted model (heavy manual work: 1.30 [1.24-1.36], prolonged  
201 non-sedentary work: 1.32 [1.28-1.37]). Sex interactions persisted, with once again stronger  
202 associations seen between work physicality and knee osteoarthritis in males than in females  
203 (Table 2, Supplementary Figure 1).

204 When assessing work type as a categorical variable (1-4) in fully adjusted models, there was  
205 no indication of a progressive positive association between both more frequent shift work and  
206 nights shifts and knee osteoarthritis, with similar results seen in the sex stratified analyses  
207 (Figure 1, Supplementary Table 2). A distinct progressive association emerged between  
208 frequency of heavy manual work and knee osteoarthritis (sometimes: 1.17 [1.12-1.22], usually:  
209 1.34 [1.26-1.42], always: 1.45 [1.36-1.55]), which was also the case for prolonged non-  
210 sedentary work (sometimes: 1.17 [1.13-1.22], usually: 1.33 [1.26-1.40], always: 1.38 [1.31-  
211 1.46]). The progressive trend was reflected in results for males and females, but effect sizes  
212 were larger in males (Figure 1, Supplementary Table 2).

## Work characteristics and large joint osteoarthritis

### 213 Hip Osteoarthritis

214 Combined sex analyses, unadjusted for work physicality, demonstrated little evidence of  
215 associations between binary shift work and hip osteoarthritis (model 1: OR 0.99 [95% CI: 0.93-  
216 1.05], model 2: 1.12 [1.05-1.20], model 3: 1.08 [1.01-1.15]). A similar lack of association was  
217 seen in analyses of night shifts. No sex interactions were seen for either exposure across models  
218 1-3 and sex-stratified analyses indicated little differences between males and females (Table 3,  
219 Supplementary Figure 2). More robust associations were seen between work physicality and  
220 hip osteoarthritis, although weaker than those for knee osteoarthritis (Table 3, Supplementary  
221 Figure 2). Sex interactions were only evident for prolonged non-sedentary work. Sex-stratified  
222 analyses saw stronger associations between prolonged non-sedentary work and hip  
223 osteoarthritis in males (model 1: 1.26 [1.19-1.34], model 2: 1.24 [1.17-1.31], model 3: 1.26  
224 [1.18-1.33]) than females (model 1: 1.14 [1.08-1.20], model 2: 1.10 [1.04-1.16] model 3: 1.10  
225 [1.04-1.16]) (Table 3, Supplementary Figure 2).

226 Mutual adjustment (model 4) further attenuated the associations between binary work  
227 characteristics and hip osteoarthritis towards the null (shift work: OR 1.01 [95% CI: 0.95-1.08],  
228 night shifts: 1.03 [0.93-1.14]). In sex-stratified analysis, a similar lack of association between  
229 hip osteoarthritis and shift work was seen in males and females (Table 3, Supplementary Figure  
230 2). In mutually adjusted combined sex analyses, associations between work physicality and hip  
231 osteoarthritis remained (heavy manual work: 1.13 [1.06-1.20], prolonged non-sedentary work:  
232 1.12 [1.07-1.17]). Heavy manual work was similarly associated with hip osteoarthritis in  
233 females (1.14 [1.04-1.25]) and males (1.10 [1.01-1.20]). Sex interactions persisted for  
234 prolonged non-sedentary work, with stronger associations in males (1.21 [1.13-1.29])  
235 compared to females (1.06 [1.00-1.13]) (Table 3, Supplementary Figure 2).

236 When assessing work type as a categorical variable (1-4) in fully adjusted models, as with knee  
237 osteoarthritis, there was no indication of a progressive positive association between both more

## Work characteristics and large joint osteoarthritis

238 frequent shift work and nights shifts and hip osteoarthritis. Similar results were seen in sex  
239 stratified analysis (Figure 2, Supplementary Table 3). A more progressive association was  
240 notable between heavy manual work frequency and hip osteoarthritis (sometimes: 1.03 [0.98-  
241 1.09], usually: 1.15 [1.06-1.25], always: 1.15 [1.05-1.26]) and prolonged non-sedentary work  
242 frequency and hip osteoarthritis (sometimes: 1.14 [1.09-1.20], usually: 1.19 [1.11-1.27],  
243 always: 1.18 [1.10-1.27]). Stronger associations between both heavy manual work and  
244 prolonged non-sedentary work and hip osteoarthritis were evident in males. Interestingly, the  
245 progressive positive association between work physical frequency and risk of hip osteoarthritis  
246 was absent in females (Figure 2, Supplementary Table 3).

247

### 248 Self-reported Osteoarthritis

249 In combined sex analyses, unadjusted for work physicality, associations between binary shift  
250 work and self-reported osteoarthritis were present across all models (model 1: OR 1.15 [95%  
251 CI: 1.09-1.21], model 2: 1.32 [1.25-1.39], model 3: 1.23 [1.17-1.30]). Similar patterns emerged  
252 in night shift analyses. For both, stronger associations were seen in males and sex interactions  
253 were present in model 3, which incorporated adjustments for BMI and TDI alongside age and  
254 sex (Table 4, Supplementary Figure 3). In combined sex analyses, unadjusted for shift work,  
255 heavy manual work showed strong associations with self-reported osteoarthritis (model 1: OR  
256 1.21 [95% CI: 1.16-1.26], model 2: 1.36 [1.30-1.42], model 3: 1.34 [1.28-1.40]). Results for  
257 prolonged non-sedentary work were similar. Like knee osteoarthritis, sex interactions were  
258 observed in all models for heavy manual work and prolonged non-sedentary work and in sex  
259 stratified analyses males exhibited higher odds of self-reported osteoarthritis (Table 4,  
260 Supplementary Figure 3).

## Work characteristics and large joint osteoarthritis

261 Like the other osteoarthritis outcomes, mutual adjustment for the other work factors (model 4)  
262 weakened the associations between binary work type and self-reported osteoarthritis. In  
263 combined sex analyses, shift work and night shifts retained associations with self-reported  
264 osteoarthritis (shift work: OR 1.13 [95% CI: 1.07-1.19], night shifts: 1.15 [1.06-1.24]). Sex  
265 interactions persisted for both (Table 4). Shift work and night shifts remained more strongly  
266 associated with self-reported osteoarthritis in males (shift work: 1.20 [1.11-1.30], night shifts:  
267 1.19 [1.07-1.33]) than in females (shift work: 1.08 [1.00-1.16], night shifts: 1.09 [0.97-1.23]).  
268 Work physicality maintained its associations with self-reported osteoarthritis (heavy manual  
269 work: 1.20 [1.14- 1.27], prolonged non-sedentary work: 1.15 [1.10-1.19]). Sex interactions  
270 remained, and again stronger associations were seen between work physicality and self-  
271 reported osteoarthritis in males than females (Table 4, Supplementary Figure 3).

272 Overall, in fully adjusted categorical analyses of shift work and night shift frequency, there  
273 were no progressive association with self-reported osteoarthritis (Figure 3, Supplementary  
274 Table 3). Regarding heavy manual work frequency, progressive stronger associations with self-  
275 reported osteoarthritis were observed in fully adjusted models (sometimes: 1.16 [1.11-1.22],  
276 usually: 1.26 [1.18-1.35], always: 1.33 [1.24- 1.44]). Prolonged non-sedentary work displayed  
277 a similar progressive trend. Unlike knee and hip osteoarthritis, increasing heavy manual work  
278 frequency, saw progressive associations with self-reported osteoarthritis in females. In contrast,  
279 for prolonged non-sedentary work, progressive associations were seen in males but not females  
280 (Figure 3, Supplementary Table 3).

281

## Work characteristics and large joint osteoarthritis

### 282 Discussion

283 As far as we are aware, this is the largest cross-sectional study to date exploring the  
284 relationships between work characteristics (i.e. shift work, night-shifts, heavy manual work  
285 and prolonged non-sedentary work) and osteoarthritis (knee, hip and self-reported). Overall,  
286 both shift work and night shifts were associated with an increased risk of knee osteoarthritis  
287 and self-reported osteoarthritis, while no such associations were observed for hip osteoarthritis.  
288 Importantly, these associations remained after adjustment for possible confounding factors  
289 including age, sex, BMI and deprivation, as well as for the physical nature of work. Greater  
290 associations were seen between work physicality and osteoarthritis compared to shift work and  
291 night shifts, which were stronger in the knee than the hip. Broadly, work characteristics showed  
292 larger association with osteoarthritis in males as compared with females. The increasing  
293 frequency of heavy manual work and prolonged non-sedentary work showed clear progressive  
294 trends with an increasing risk of osteoarthritis. Shift work and night shifts did not display a  
295 similar trend.

296

297 Previous epidemiological research has linked shift work to an increased risk of osteoarthritis,  
298 in smaller Chinese cohorts. One study saw a hazard ratio of 1.19 for knee osteoarthritis in shift  
299 workers compared to non-shift workers, after adjusting for work posture but also working years  
300 (13). Another study saw a comparable OR of 1.22 for lower-limb osteoarthritis in shift workers  
301 compared to day workers, after adjusting for work posture (14). In comparison, this study saw  
302 an OR of 1.12 for both shift work and night shifts with knee osteoarthritis, after adjusting for  
303 work physicality. The lack of a progressive association between increasing frequency of shift  
304 work or night shifts with risk of osteoarthritis could be attributed to the limited number of  
305 responses in the “usually” group, which underpowered these analyses. Nevertheless,

## Work characteristics and large joint osteoarthritis

306 progressive positive associations were present in physicality analyses, suggesting these  
307 associations are weaker for shift work. Another explanation is circadian adaptation among  
308 more permanent shift workers. However, research indicates that less than 3% show complete  
309 adjustment with only 25% experiencing a beneficial degree of adjustment. Therefore, it is  
310 unlikely that most workers undergo sufficient synchronisation to benefit their health (22).

311

312 Although causal associations cannot be inferred from this cross-sectional study, the findings  
313 are supported by animal studies, where circadian rhythm disruption, whether through  
314 environmental disturbance or genetic deletion of clock genes, contributed to osteoarthritis-like  
315 changes (11, 23). While underlying mechanisms remain unclear, shift work is an established  
316 cause of circadian misalignment, due to frequent alterations in sleep-wake and light-dark cycles  
317 and has been shown to desynchronise clock gene expression (24). Therefore, shift work may  
318 be viewed as a proxy for circadian rhythm disruption and these findings provide evidence that  
319 circadian rhythm dysfunction is an important risk factor for osteoarthritis. Interestingly, genetic  
320 knockout animal studies only saw degenerative cartilage changes in the knee joint and not at  
321 the hip, as was seen in this study (23). Since work physicality was adjusted for, this suggests  
322 that the knee may be more vulnerable to the effects of circadian rhythm disruption, independent  
323 of more extreme physical stressors. Indeed existing research has indicated disparities in the  
324 cellular and molecular pathophysiology of knee and hip osteoarthritis, including differences in  
325 inflammatory processes (25), but further research is required to elucidate any differences within  
326 the context of shift work and circadian rhythm disruption.

327

328 Both heavy manual work and prolonged non-sedentary work exposures demonstrated  
329 associations with all osteoarthritis outcomes. Occupational physical stressors and risk of



## Work characteristics and large joint osteoarthritis

330 osteoarthritis have been more extensively explored. For instance, a longitudinal cohort study  
331 found heavy manual work was associated with an increased risk of knee osteoarthritis, double  
332 that of sedentary work (26). In another cross-sectional study, workers conducting highly  
333 physical work exhibited a nearly two-fold higher prevalence of symptomatic osteoarthritis,  
334 compared to those with less physical work (27). Multiple reviews have also concluded that  
335 occupations characterised by heavy physical workloads, repetitive actions and prolonged  
336 walking and standing are associated with increased risk of knee and hip osteoarthritis (28-30).

337

338 Although heavy manual work and prolonged non-sedentary work showed associations with  
339 both knee and hip osteoarthritis, these were stronger at the knee. A different study also saw a  
340 greater association between job-related physical activity and knee osteoarthritis, with a hazard  
341 ratio of 1.39 compared with 1.22 for hip osteoarthritis (31). This may be explained by the  
342 increased susceptibility of the knee to biomechanical stress. During everyday movements the  
343 knee experiences higher peak compressive forces compared to the hip (32). Moreover, as the  
344 knee has more restricted movement and less stability, it is more inclined to injury, which can  
345 accelerate degenerative changes (25, 33).

346

347 Despite associations being present for both males and females, work physicality mostly  
348 displayed stronger associations with osteoarthritis in males. Similarly, a meta-analysis of 71  
349 studies found greater odds of knee osteoarthritis in workers with physically demanding  
350 occupations, that were male (OR 1.61), compared to female (1.35) (28). Across all occupations,  
351 men demonstrate a stronger correlation between physical stressors, repetitive tasks, work  
352 demands and risk of injury (34). Moreover, in hip osteoarthritis analyses, the progressive  
353 associations between work frequency and risk of osteoarthritis were not observed in females

## Work characteristics and large joint osteoarthritis

354 and similar findings have been reported in other studies where positive associations were solely  
355 found in males (35). These differences could be attributed to the greater engagement in manual  
356 labour among the male demographic, reflected by the larger number of male-only studies (35),  
357 but more work is justified to fully understand the reasons behind this.

358

359 This study has identified robust associations between work-related exposures and large-joint  
360 osteoarthritis, which have important implications for occupational health policies. Further  
361 research is needed to establish causal relationships through randomised trials of workplace  
362 interventions. For example, therapies and interventions that tackle sleep hygiene, shift timing  
363 and light exposures have demonstrated favourable results in improving sleep among shift  
364 workers and may have a positive impact on joint health (36). Considering that certain  
365 occupational exposures are likely unavoidable, it may be more feasible to examine dose-  
366 response associations to identify thresholds of safe working and to introduce closer monitoring  
367 or screening of musculoskeletal health in these workers. Another area of interest is the potential  
368 chronotherapeutic administration of prospective disease-modifying therapies and it may be  
369 useful to explore differences in medication timing between day and night shift workers (37).

370

371 A notable strength of this study is its large sample size, enhancing the statistical power of the  
372 analyses. Mutual-adjustment allowed for the estimation of independent associations between  
373 shift work and work physicality with risk of osteoarthritis, to be drawn, addressing a gap in  
374 prior research. UKB contains extensive lifestyle data, enabling adjustments for age, sex, BMI  
375 and deprivation, which have been associated with osteoarthritis and employment. Previously,  
376 socioeconomic status has been largely unconsidered (13, 14), but was included in this study.

377

## Work characteristics and large joint osteoarthritis

378 A main limitation of this study is its cross-sectional nature, preventing the inference of causal  
379 associations in isolation. Having osteoarthritis could influence choices about employment, as  
380 these individuals would be more likely to avoid physically demanding or prolonged non-  
381 sedentary jobs, which could lower their odds. For shift work, the triangulation between this  
382 study and animal studies does add to the causal hypothesis that circadian rhythm dysfunction  
383 causes knee osteoarthritis. The population within UKB predominantly comprises Caucasian  
384 participants and those who tend to be more healthy and less deprived, restricting  
385 generalisability to other ethnicities. Additional research among more ethnically diverse cohorts  
386 would be beneficial. Another limitation is that this study was unable to account for employment  
387 duration (i.e. years worked) or regularity of shift patterns (e.g. fixed versus rotating shifts),  
388 which are likely to be important components of risk.

389

390 In conclusion, this large cross-sectional study saw independent associations between shift work  
391 and both knee and self-reported osteoarthritis, but not hip osteoarthritis. These findings support  
392 the role of circadian rhythm dysfunction as a contributing factor in knee osteoarthritis  
393 pathogenesis, which aligns with the results of previous animal studies. Although further  
394 replication of these findings is warranted given the duration of work exposures were not known.  
395 Work physicality demonstrated association with osteoarthritis at all sites, with the strongest  
396 associations seen in the knee, possibly reflecting its higher susceptibility to biomechanical  
397 stress. These findings highlight the importance of the workplace environment in risk factor  
398 management and could inform strategies to promote joint health in the workforce. Further  
399 research is warranted to explore the effects of workplace interventions in minimising the risk  
400 of osteoarthritis and to investigate the anatomical discrepancies that were observed.

401

## Work characteristics and large joint osteoarthritis

402 Acknowledgements:

403 This work has been conducted using the UK Biobank resource, access application 17295.

404

405 Author contributions:

406 Significant contributions were made by all authors towards the conception and design of this  
407 study, the acquisition of data, its analysis and interpretation. Each author helped draft the article  
408 before agreeing the final version of this manuscript. Asad Hashmi (tc20694@bristol.ac.uk)  
409 takes full responsibility for the integrity of the work.

410

411 Role of the funding source:

412 AH and SS were self-funded undergraduate students. BGF is supported by an NIHR Academic  
413 Clinical Lectureship. RB and MJ were supported by a Wellcome Trust collaborative award  
414 (209233/Z/17/Z). QJM was supported by a Versus Arthritis Senior Fellowship Award 20875.

415

416 Competing interest statement:

417 None to declare.

## Work characteristics and large joint osteoarthritis

### 418 References

- 419 1. Steinmetz JD, Culbreth GT, Haile LM, Rafferty Q, Lo J, Fukutaki KG, et al. Global,  
420 regional, and national burden of osteoarthritis, 1990–2020 and projections to 2050: a  
421 systematic analysis for the Global Burden of Disease Study 2021. *The Lancet Rheumatology*.  
422 2023;5(9):e508-e22.
- 423 2. Versus Arthritis. THE STATE OF MUSCULOSKELETAL HEALTH 2023: Arthritis  
424 and other musculoskeletal conditions in numbers. 2023. p. 6.
- 425 3. Long H, Liu Q, Yin H, Wang K, Diao N, Zhang Y, et al. Prevalence Trends of Site-  
426 Specific Osteoarthritis From 1990 to 2019: Findings From the Global Burden of Disease  
427 Study 2019. *Arthritis & Rheumatology*. 2022;74(7):1172-83.
- 428 4. OECD. Hours worked (indicator). 2024 [10/03/24]. Available from:  
429 <https://data.oecd.org/emp/hours-worked.htm>.
- 430 5. Eurofound, Wilczynska A, Cabrita J, Parent-Thirion A, Biletta I, Vargas O, et al. 6th  
431 European working conditions survey – 2017 update: Publications Office; 2017.
- 432 6. Rogers N, Meng Q-J. Tick tock, the cartilage clock. *Osteoarthritis and Cartilage*.  
433 2023;31(11):1425-36.
- 434 7. Takahashi JS. Transcriptional architecture of the mammalian circadian clock. *Nature*  
435 *Reviews Genetics*. 2017;18(3):164-79.
- 436 8. Poulsen RC, Hearn JI, Dalbeth N. The circadian clock: a central mediator of cartilage  
437 maintenance and osteoarthritis development? *Rheumatology*. 2021;60(7):3048-57.
- 438 9. Akagi R, Akatsu Y, Fisch KM, Alvarez-Garcia O, Teramura T, Muramatsu Y, et al.  
439 Dysregulated circadian rhythm pathway in human osteoarthritis: NR1D1 and BMAL1  
440 suppression alters TGF- $\beta$  signaling in chondrocytes. *Osteoarthritis Cartilage*. 2017;25(6):943-  
441 51.
- 442 10. Du Z, You X, Wu D, Huang S, Zhou Z. Rhythm disturbance in osteoarthritis. *Cell*  
443 *Communication and Signaling*. 2022;20(1):70.
- 444 11. Kc R, Li X, Voigt RM, Ellman MB, Summa KC, Vitaterna MH, et al. Environmental  
445 disruption of circadian rhythm predisposes mice to osteoarthritis-like changes in knee joint. *J*  
446 *Cell Physiol*. 2015;230(9):2174-83.
- 447 12. Boivin DB, Boudreau P, Kosmadopoulos A. Disturbance of the Circadian System in  
448 Shift Work and Its Health Impact. *Journal of Biological Rhythms*. 2022;37(1):3-28.
- 449 13. Zhou M, Yang S, Guo Y, Wang D, Qiu W, Wang B, et al. Shift work and the risk of  
450 knee osteoarthritis among Chinese workers: a retrospective cohort study. *Scandinavian*  
451 *Journal of Work, Environment & Health*. 2020(2):152-60.
- 452 14. Zhou H, Zhou M, Qiu WH, Wang MY, Chen JH, Wang DM, et al. [The association  
453 between shift work and lower extremity osteoarthritis among retired workers]. *Zhonghua Yu*  
454 *Fang Yi Xue Za Zhi*. 2021;55(6):759-66.
- 455 15. Bevilacqua G, D'Angelo S, Ntani G, Stevens M, Linaker CH, Walker-Bone K. Shift  
456 work amongst older UK workers and job exit. *Occupational Medicine*. 2021;71(9):429-38.
- 457 16. Cooper C, McAlindon T, Coggon D, Egger P, Dieppe P. Occupational activity and  
458 osteoarthritis of the knee. *Ann Rheum Dis*. 1994;53(2):90-3.
- 459 17. Felson DT, Hannan MT, Naimark A, Berkeley J, Gordon G, Wilson PW, et al.  
460 Occupational physical demands, knee bending, and knee osteoarthritis: results from the  
461 Framingham Study. *J Rheumatol*. 1991;18(10):1587-92.
- 462 18. Croft P, Coggon D, Cruddas M, Cooper C. Osteoarthritis of the hip: an occupational  
463 disease in farmers. *Bmj*. 1992;304(6837):1269-72.
- 464 19. Bycroft C, Freeman C, Petkova D, Band G, Elliott LT, Sharp K, et al. The UK  
465 Biobank resource with deep phenotyping and genomic data. *Nature*. 2018;562(7726):203-9.

## Work characteristics and large joint osteoarthritis

- 466 20. Zengini E, Hatzikotoulas K, Tachmazidou I, Steinberg J, Hartwig FP, Southam L, et  
467 al. Genome-wide analyses using UK Biobank data provide insights into the genetic  
468 architecture of osteoarthritis. *Nat Genet.* 2018;50(4):549-58.
- 469 21. Townsend P, Phillimore P, Beattie A. Health and deprivation: inequality and the  
470 North: Taylor & Francis; 1988.
- 471 22. Folkard S. Do permanent night workers show circadian adjustment? A review based  
472 on the endogenous melatonin rhythm. *Chronobiol Int.* 2008;25(2):215-24.
- 473 23. Dudek M, Gossan N, Yang N, Im HJ, Ruckshanthi JP, Yoshitane H, et al. The  
474 chondrocyte clock gene *Bmal1* controls cartilage homeostasis and integrity. *J Clin Invest.*  
475 2016;126(1):365-76.
- 476 24. Cuesta M, Boudreau P, Cermakian N, Boivin DB. Rapid resetting of human peripheral  
477 clocks by phototherapy during simulated night shift work. *Sci Rep.* 2017;7(1):16310.
- 478 25. Hall M, van der Esch M, Hinman RS, Peat G, de Zwart A, Quicke JG, et al. How does  
479 hip osteoarthritis differ from knee osteoarthritis? *Osteoarthritis and Cartilage.* 2022;30(1):32-  
480 41.
- 481 26. Perry TA, Wang X, Gates L, Parsons CM, Sanchez-Santos MT, Garriga C, et al.  
482 Occupation and risk of knee osteoarthritis and knee replacement: A longitudinal, multiple-  
483 cohort study. *Seminars in Arthritis and Rheumatism.* 2020;50(5):1006-14.
- 484 27. d'Errico A, Fontana D, Sebastiani G, Ardito C. Risk of symptomatic osteoarthritis  
485 associated with exposure to ergonomic factors at work in a nationwide Italian survey. *Int*  
486 *Arch Occup Environ Health.* 2023;96(1):143-54.
- 487 28. Wang X, Perry TA, Arden N, Chen L, Parsons CM, Cooper C, et al. Occupational  
488 Risk in Knee Osteoarthritis: A Systematic Review and Meta-Analysis of Observational  
489 Studies. *Arthritis Care Res (Hoboken).* 2020;72(9):1213-23.
- 490 29. Unverzagt S, Bolm-Audorff U, Frese T, Hechtel J, Liebers F, Moser K, et al. Influence  
491 of physically demanding occupations on the development of osteoarthritis of the hip: a  
492 systematic review. *Journal of Occupational Medicine and Toxicology.* 2022;17(1):18.
- 493 30. Canetti EFD, Schram B, Orr RM, Knapik J, Pope R. Risk factors for development of  
494 lower limb osteoarthritis in physically demanding occupations: A systematic review and  
495 meta-analysis. *Applied Ergonomics.* 2020;86:103097.
- 496 31. Zhu J, Chen W, Hu Y, Qu Y, Yang H, Zeng Y, et al. Physical activity patterns, genetic  
497 susceptibility, and risk of hip/knee osteoarthritis: a prospective cohort study based on the UK  
498 Biobank. *Osteoarthritis and Cartilage.* 2022;30(8):1079-90.
- 499 32. Luepingsak N, Amin S, Krebs DE, McGibbon CA, Felson D. The contribution of  
500 type of daily activity to loading across the hip and knee joints in the elderly. *Osteoarthritis*  
501 *Cartilage.* 2002;10(5):353-9.
- 502 33. Chhabra A, Elliott CC, Miller MD. Normal Anatomy and Biomechanics of the Knee.  
503 *Sports Medicine and Arthroscopy Review.* 2001;9(3):166-77.
- 504 34. Biswas A, Harbin S, Irvin E, Johnston H, Begum M, Tiong M, et al. Differences  
505 between men and women in their risk of work injury and disability: A systematic review. *Am*  
506 *J Ind Med.* 2022;65(7):576-88.
- 507 35. Sun Y, Nold A, Glitsch U, Bochmann F. Hip Osteoarthritis and Physical Workload:  
508 Influence of Study Quality on Risk Estimations-A Meta-Analysis of Epidemiological  
509 Findings. *Int J Environ Res Public Health.* 2019;16(3).
- 510 36. Robbins R, Underwood P, Jackson CL, Jean-Louis G, Madhavaram S, Kuriakose S, et  
511 al. A Systematic Review of Workplace-Based Employee Health Interventions and Their  
512 Impact on Sleep Duration Among Shift Workers. *Workplace Health & Safety.*  
513 2021;69(11):525-39.
- 514 37. Dernie F, Adeyoju D. A matter of time: Circadian clocks in osteoarthritis and the  
515 potential of chronotherapy. *Experimental Gerontology.* 2021;143:111163.

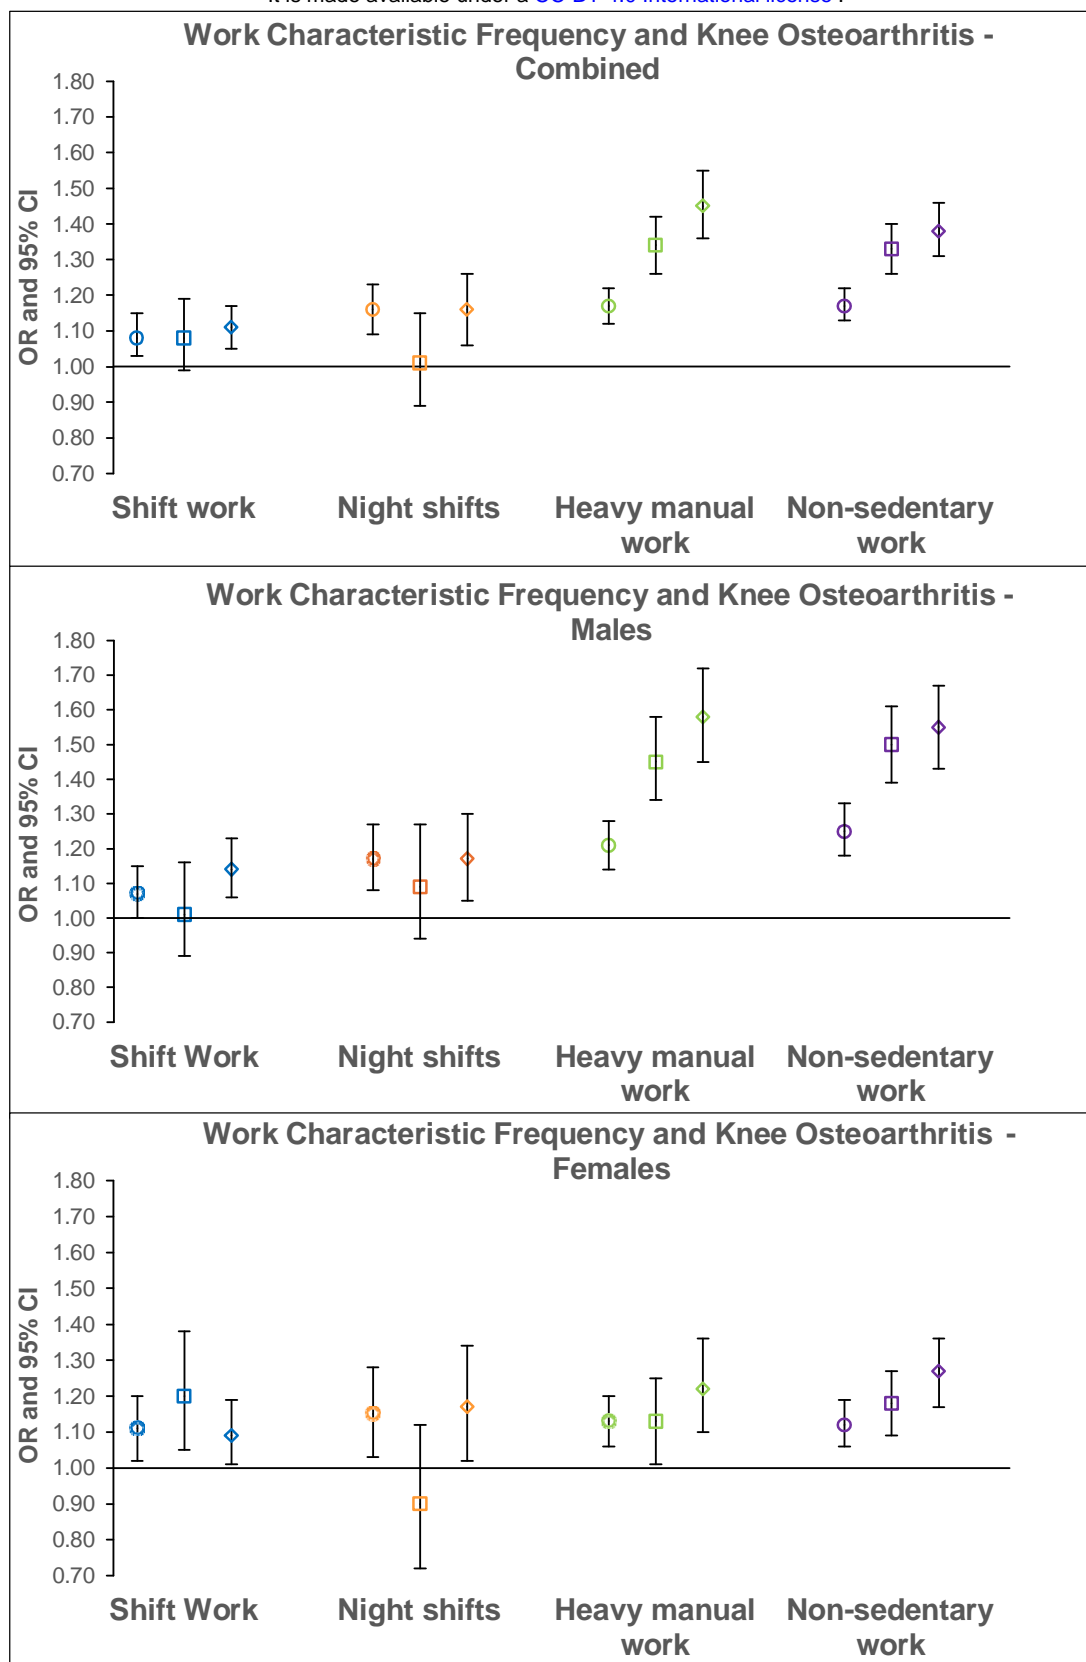

**Figure 1 – Logistic regression results for the associations between categorical work characteristic frequency and knee osteoarthritis in fully-adjusted combined and sex-stratified analyses.**

Odds ratios with the comparator group “never” are displayed with 95% confidence intervals. Different shapes represent the various employment intensities - circle: “sometimes”, square: “usually” and diamond: “always”.

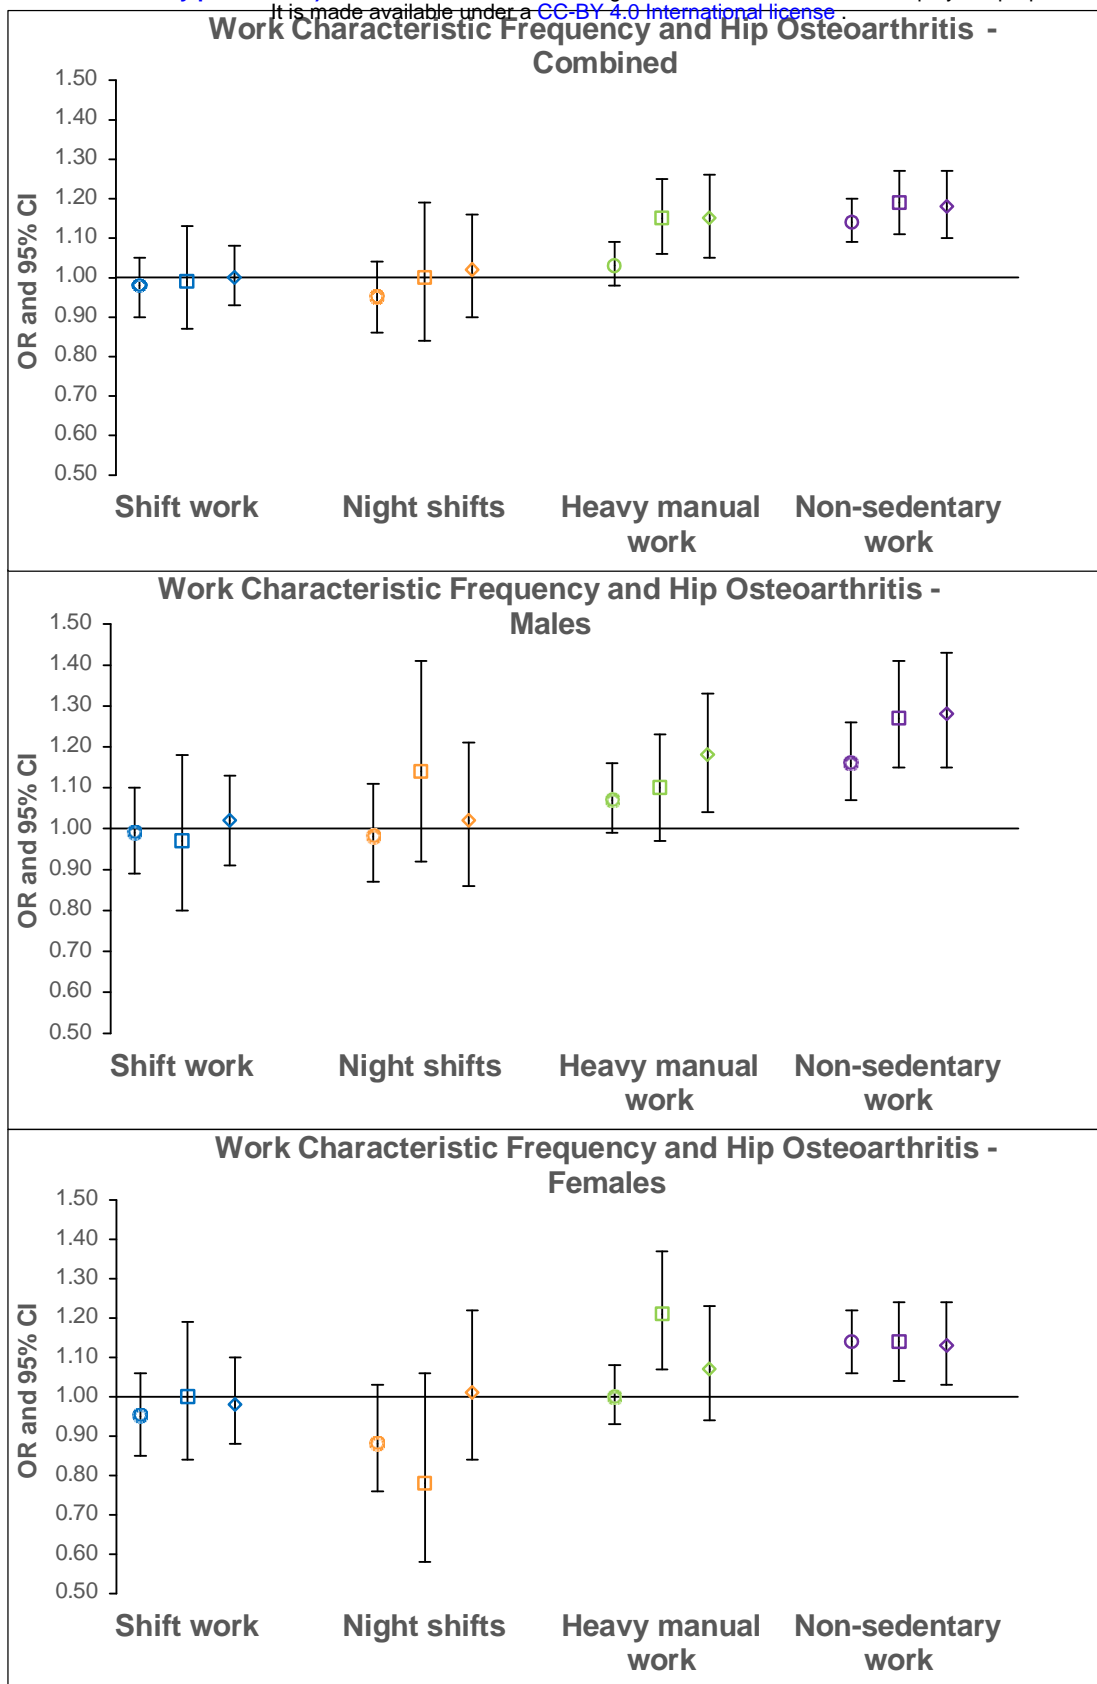

**Figure 2 – Logistic regression results for the associations between categorical work characteristic frequency and hip osteoarthritis in fully-adjusted combined and sex-stratified analyses.**

Odds ratios with the comparator group “never” are displayed with 95% confidence intervals. Different shapes represent the various employment intensities - circle: “sometimes”, square: “usually” and diamond: “always”.



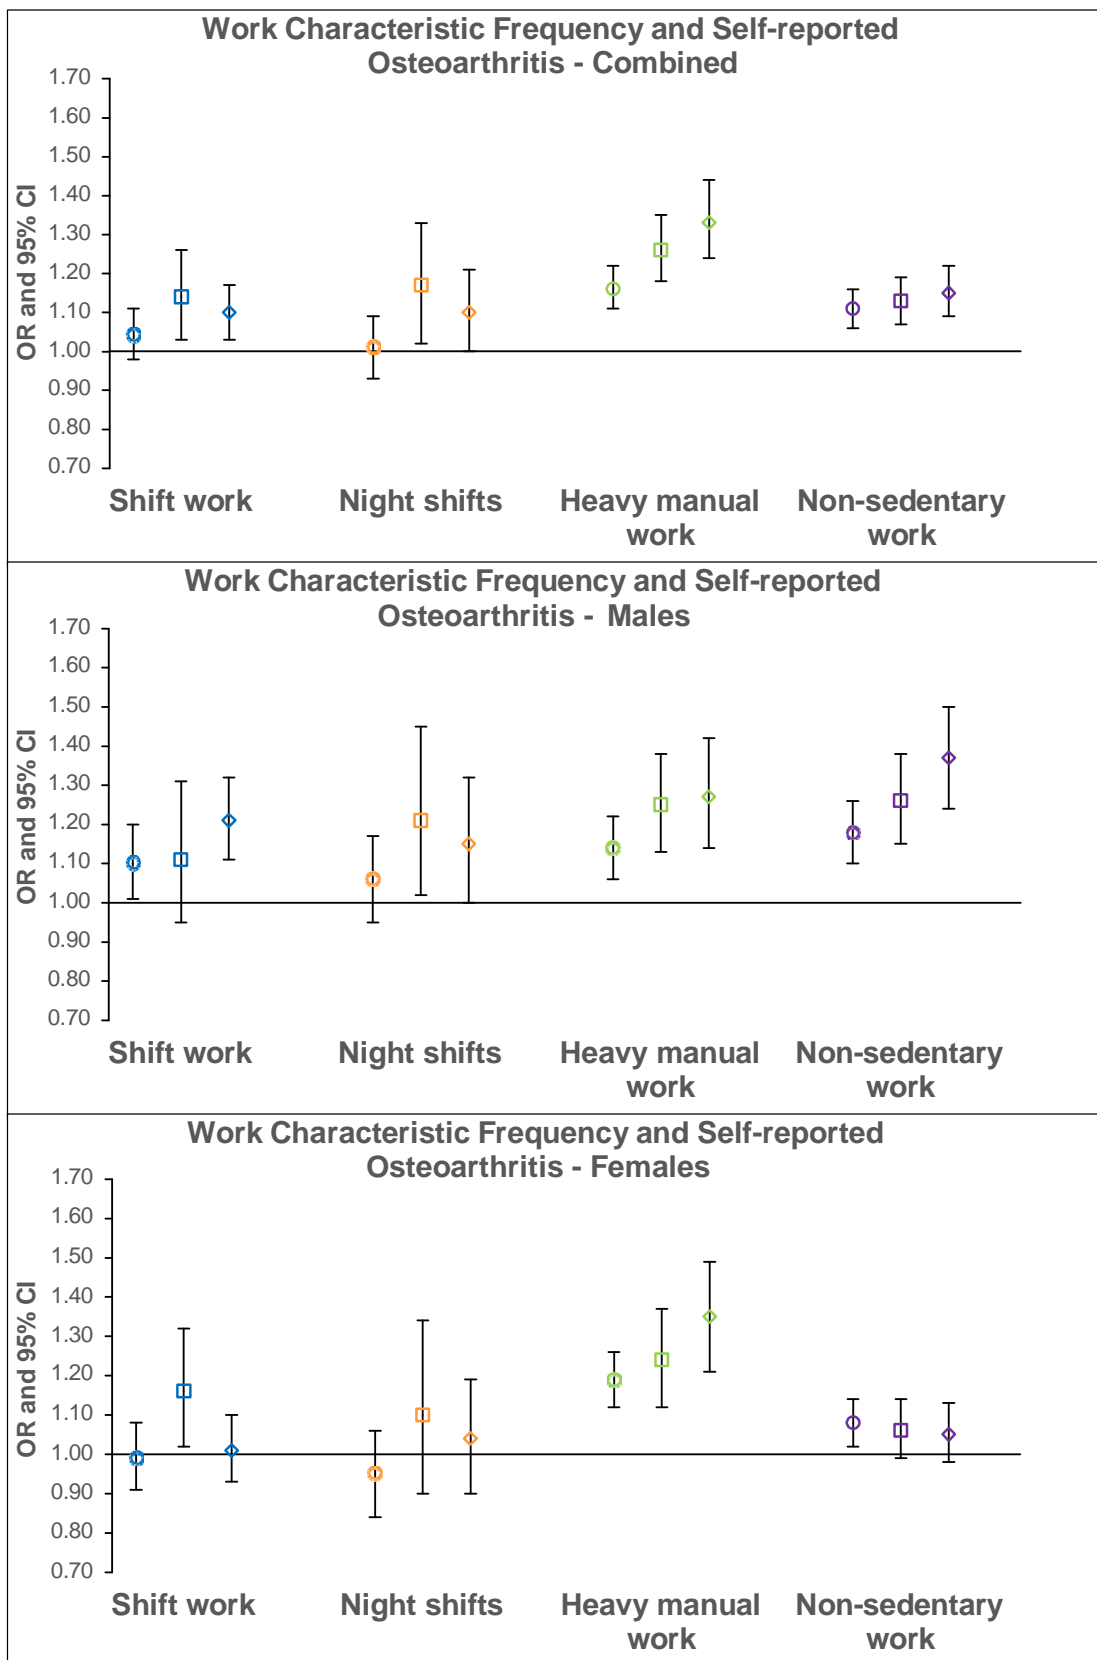

**Figure 3 – Logistic regression results for the associations between categorical work characteristic frequency and self-reported osteoarthritis in fully-adjusted combined and sex-stratified analyses.**

Odds ratios with the comparator group “never” are displayed with 95% confidence intervals. Different shapes represent the various employment intensities - circle: “sometimes”, square: “usually” and diamond: “always”.

**Table 1 - Descriptive statistics of study population**

|                                     | <b>Combined</b>         | <b>Male</b>             | <b>Female</b>           |
|-------------------------------------|-------------------------|-------------------------|-------------------------|
|                                     | <b>Mean [SD, Range]</b> | <b>Mean [SD, Range]</b> | <b>Mean [SD, Range]</b> |
| Age at baseline                     | 52.7 [7.1, 38-71]       | 53.2 [7.4, 38-70]       | 52.3 [6.8, 40-71]       |
| BMI                                 | 27.3 [4.7, 13.6-74.7]   | 27.8 [4.1, 14.9-63.3]   | 26.8 [5.1, 13.6-74.7]   |
| TDI                                 | -1.3 [3.0, -6.3-11.0]   | -1.4 [3.0, -6.3-10.5]   | -1.3 [3.0, -6.3-11.0]   |
| <b>Categorical Exposures</b>        | <b>N [%]</b>            | <b>N [%]</b>            | <b>N [%]</b>            |
| <b>Shift work</b>                   |                         |                         |                         |
| Never/Rarely                        | 235,136 [82.2]          | 109,362 [79.7]          | 125,774 [84.5]          |
| Sometimes                           | 21,855 [7.6]            | 12,043 [8.8]            | 9,812 [6.6]             |
| Usually                             | 6,271 [2.2]             | 3,217 [2.4]             | 3,054 [2.1]             |
| Always                              | 22,685 [7.9]            | 12,532 [9.1]            | 10,153 [6.8]            |
| <b>Night shifts</b>                 |                         |                         |                         |
| Never/Rarely                        | 260,177 [91.0]          | 121,194 [88.4]          | 138,983 [93.4]          |
| Sometimes                           | 14,432 [5.1]            | 8,929 [6.5]             | 5,503 [3.7]             |
| Usually                             | 3,968 [1.4]             | 2,512 [1.8]             | 1,456 [1.0]             |
| Always                              | 7,370 [2.6]             | 4,519 [3.3]             | 2,851 [1.9]             |
| <b>Heavy manual work</b>            |                         |                         |                         |
| Never/Rarely                        | 183,796 [64.3]          | 81,022 [59.1]           | 102,774 [69.1]          |
| Sometimes                           | 62,355 [21.8]           | 31,693 [23.1]           | 30,662 [20.6]           |
| Usually                             | 20,010 [7.0]            | 12,257 [8.9]            | 7,753 [5.2]             |
| Always                              | 19,786 [6.9]            | 12,182 [8.9]            | 7,604 [5.1]             |
| <b>Non-sedentary work</b>           |                         |                         |                         |
| Never/Rarely                        | 97,507 [34.1]           | 44,043 [32.1]           | 53,464 [35.9]           |
| Sometimes                           | 87,981 [30.8]           | 43,956 [32.1]           | 44,025 [29.6]           |
| Usually                             | 43,023 [15.1]           | 21,470 [15.7]           | 21,553 [14.5]           |
| Always                              | 57,436 [20.1]           | 27,685 [20.2]           | 29,751 [20.0]           |
| <b>Outcomes</b>                     |                         |                         |                         |
| Knee osteoarthritis                 | 18,578 [6.5]            | 9,623 [7.0]             | 8,955 [6.0]             |
| Hip osteoarthritis                  | 10,698 [3.7]            | 4,803 [3.5]             | 5,895 [4.0]             |
| Self-reported osteoarthritis        | 16,407 [5.7]            | 6,389 [4.7]             | 10,018 [6.7]            |
| <b>Total number of observations</b> | <b>285,947 [100.0]</b>  | <b>137,154 [48.0]</b>   | <b>148,793 [52.0]</b>   |

*Abbreviations: BMI – body mass index, TDI – Townsend Deprivation Index*

**Table 2 - Logistic regression results showing the associations between binary work exposures and knee osteoarthritis in combined and sex-stratified analyses.**

| Knee Osteoarthritis       | Model 1          |                           | Model 2          |                           | Model 3          |                           | Model 4          |                          |
|---------------------------|------------------|---------------------------|------------------|---------------------------|------------------|---------------------------|------------------|--------------------------|
|                           | OR [95% CI]      | P                         | OR [95% CI]      | P                         | OR [95% CI]      | P                         | OR [95% CI]      | P                        |
| <b>Combined</b>           |                  |                           |                  |                           |                  |                           |                  |                          |
| <b>Shift work</b>         | 1.31 [1.25-1.37] | $8.87 \times 10^{-32}$ *  | 1.42 [1.36-1.49] | $6.30 \times 10^{-52}$    | 1.29 [1.23-1.35] | $3.73 \times 10^{-27}$    | 1.12 [1.07-1.17] | $3.87 \times 10^{-6}$ *  |
| <b>Night shifts</b>       | 1.32 [1.23-1.42] | $1.26 \times 10^{-15}$    | 1.46 [1.36-1.57] | $6.61 \times 10^{-27}$    | 1.30 [1.21-1.39] | $3.39 \times 10^{-13}$    | 1.12 [1.04-1.20] | $1.75 \times 10^{-3}$ *  |
| <b>Heavy manual work</b>  | 1.55 [1.49-1.61] | $2.00 \times 10^{-113}$ * | 1.59 [1.53-1.65] | $3.00 \times 10^{-122}$ * | 1.58 [1.52-1.64] | $4.00 \times 10^{-114}$ * | 1.30 [1.24-1.36] | $5.76 \times 10^{-30}$ * |
| <b>Non-sedentary work</b> | 1.48 [1.44-1.53] | $2.00 \times 10^{-146}$ * | 1.46 [1.41-1.50] | $7.00 \times 10^{-131}$ * | 1.48 [1.43-1.52] | $3.00 \times 10^{-135}$ * | 1.32 [1.28-1.37] | $5.30 \times 10^{-54}$ * |
| <b>Males</b>              |                  |                           |                  |                           |                  |                           |                  |                          |
| <b>Shift work</b>         | 1.24 [1.16-1.31] | $9.11 \times 10^{-12}$    | 1.39 [1.31-1.48] | $6.79 \times 10^{-26}$    | 1.32 [1.24-1.40] | $1.09 \times 10^{-17}$    | 1.14 [1.07-1.21] | $8.34 \times 10^{-5}$ *  |
| <b>Night shifts</b>       | 1.24 [1.14-1.35] | $1.14 \times 10^{-6}$     | 1.43 [1.31-1.56] | $1.41 \times 10^{-15}$    | 1.34 [1.23-1.46] | $1.14 \times 10^{-10}$    | 1.15 [1.05-1.26] | $2.14 \times 10^{-3}$ *  |
| <b>Heavy manual work</b>  | 1.65 [1.57-1.73] | $4.70 \times 10^{-93}$    | 1.73 [1.65-1.81] | $2.00 \times 10^{-108}$   | 1.76 [1.68-1.85] | $3.00 \times 10^{-112}$   | 1.38 [1.30-1.46] | $6.18 \times 10^{-28}$ * |
| <b>Non-sedentary work</b> | 1.66 [1.59-1.73] | $6.00 \times 10^{-126}$   | 1.64 [1.58-1.71] | $3.00 \times 10^{-119}$   | 1.69 [1.62-1.76] | $3.00 \times 10^{-127}$   | 1.45 [1.38-1.52] | $1.10 \times 10^{-4}$ *  |
| <b>Females</b>            |                  |                           |                  |                           |                  |                           |                  |                          |
| <b>Shift work</b>         | 1.38 [1.29-1.47] | $1.65 \times 10^{-20}$    | 1.45 [1.36-1.55] | $7.40 \times 10^{-27}$    | 1.26 [1.18-1.36] | $4.59 \times 10^{-11}$    | 1.14 [1.06-1.22] | $6.78 \times 10^{-4}$ *  |
| <b>Night shifts</b>       | 1.39 [1.24-1.55] | $9.06 \times 10^{-9}$     | 1.49 [1.33-1.67] | $3.30 \times 10^{-12}$    | 1.23 [1.10-1.38] | $4.09 \times 10^{-4}$     | 1.09 [0.97-1.23] | 0.14                     |
| <b>Heavy manual work</b>  | 1.32 [1.24-1.41] | $1.48 \times 10^{-17}$    | 1.38 [1.29-1.47] | $3.82 \times 10^{-22}$    | 1.31 [1.23-1.40] | $6.39 \times 10^{-16}$    | 1.12 [1.04-1.21] | $1.97 \times 10^{-3}$ *  |
| <b>Non-sedentary work</b> | 1.31 [1.25-1.37] | $1.26 \times 10^{-33}$    | 1.28 [1.22-1.33] | $1.32 \times 10^{-27}$    | 1.28 [1.23-1.34] | $1.62 \times 10^{-27}$    | 1.22 [1.16-1.28] | $1.76 \times 10^{-14}$ * |

Adjusted accordingly: Model 1 – unadjusted, Model 2 – age and sex, Model 3 – age, sex, BMI and TDI, Model 4 – age, sex, BMI, TDI and other employment factors.

\* Denotes a sex interaction term with P-value <0.1.

**Table 3 - Logistic regression results showing the associations between binary work exposures and hip osteoarthritis in combined and sex-stratified analyses.**

| Hip Osteoarthritis | Model 1          |                          | Model 2          |                          | Model 3          |                          | Model 4          |                       |
|--------------------|------------------|--------------------------|------------------|--------------------------|------------------|--------------------------|------------------|-----------------------|
|                    | OR [95% CI]      | P                        | OR [95% CI]      | P                        | OR [95% CI]      | P                        | OR [95% CI]      | P                     |
| <b>Combined</b>    |                  |                          |                  |                          |                  |                          |                  |                       |
| Shift work         | 0.99 [0.93-1.05] | 0.74                     | 1.12 [1.05-1.20] | $5.60 \times 10^{-4}$    | 1.08 [1.01-1.15] | 0.03                     | 1.01 [0.95-1.08] | 0.74                  |
| Night shifts       | 0.97 [0.88-1.07] | 0.54                     | 1.16 [1.04-1.28] | $5.24 \times 10^{-3}$    | 1.10 [0.99-1.21] | 0.08                     | 1.03 [0.93-1.14] | 0.59*                 |
| Heavy manual work  | 1.13 [1.07-1.19] | $1.00 \times 10^{-5}$    | 1.22 [1.15-1.29] | $1.55 \times 10^{-12}$   | 1.22 [1.15-1.28] | $2.87 \times 10^{-12}$   | 1.13 [1.06-1.20] | $1.32 \times 10^{-6}$ |
| Non-sedentary work | 1.19 [1.14-1.24] | $5.10 \times 10^{-18}$ * | 1.16 [1.11-1.21] | $3.53 \times 10^{-13}$ * | 1.17 [1.12-1.21] | $5.17 \times 10^{-14}$ * | 1.12 [1.07-1.17] | $1.39 \times 10^{-6}$ |
| <b>Males</b>       |                  |                          |                  |                          |                  |                          |                  |                       |
| Shift work         | 0.96 [0.88-1.05] | 0.39                     | 1.12 [1.02-1.23] | 0.01                     | 1.09 [0.99-1.19] | 0.08                     | 1.02 [0.93-1.12] | 0.67                  |
| Night shifts       | 0.99 [0.86-1.12] | 0.83                     | 1.19 [1.04-1.36] | $9.45 \times 10^{-3}$    | 1.15 [1.01-1.31] | 0.04                     | 1.08 [0.94-1.23] | 0.27                  |
| Heavy manual work  | 1.16 [1.08-1.25] | $3.96 \times 10^{-5}$    | 1.23 [1.14-1.32] | $3.40 \times 10^{-8}$    | 1.24 [1.15-1.33] | $7.12 \times 10^{-9}$    | 1.10 [1.01-1.20] | 0.03                  |
| Non-sedentary work | 1.26 [1.19-1.34] | $5.51 \times 10^{-15}$   | 1.24 [1.17-1.31] | $1.34 \times 10^{-12}$   | 1.26 [1.18-1.33] | $5.04 \times 10^{-14}$   | 1.21 [1.13-1.29] | $1.18 \times 10^{-6}$ |
| <b>Females</b>     |                  |                          |                  |                          |                  |                          |                  |                       |
| Shift work         | 1.04 [0.95-1.13] | 0.43                     | 1.11 [1.01-1.21] | 0.03                     | 1.06 [0.96-1.16] | 0.25                     | 1.00 [0.91-1.10] | 0.95                  |
| Night shifts       | 0.99 [0.85-1.16] | 0.90                     | 1.08 [0.93-1.27] | 0.31                     | 1.01 [0.86-1.19] | 0.88                     | 0.95 [0.81-1.11] | 0.53                  |
| Heavy manual work  | 1.14 [1.05-1.24] | $1.53 \times 10^{-3}$    | 1.20 [1.11-1.30] | $1.38 \times 10^{-5}$    | 1.19 [1.09-1.29] | $5.53 \times 10^{-5}$    | 1.14 [1.04-1.25] | $4.75 \times 10^{-3}$ |
| Non-sedentary work | 1.14 [1.08-1.20] | $2.53 \times 10^{-6}$    | 1.10 [1.04-1.16] | $8.64 \times 10^{-4}$    | 1.10 [1.04-1.16] | $7.82 \times 10^{-4}$    | 1.06 [1.00-1.13] | 0.06                  |

Adjusted accordingly: Model 1 – unadjusted, Model 2 – age and sex, Model 3 – age, sex, BMI and TDI, Model 4 – age, sex, BMI, TDI and other employment factors.

\* Denotes a sex interaction term with P-value <0.1.

**Table 4 - Logistic regression results showing the associations between binary work exposures and self-reported osteoarthritis in combined and sex-stratified analyses.**

| Self-reported Osteoarthritis | Model 1          |                          | Model 2          |                          | Model 3          |                          | Model 4          |                          |
|------------------------------|------------------|--------------------------|------------------|--------------------------|------------------|--------------------------|------------------|--------------------------|
|                              | OR [95% CI]      | P                        | OR [95% CI]      | P                        | OR [95% CI]      | P                        | OR [95% CI]      | P                        |
| <b>Combined</b>              |                  |                          |                  |                          |                  |                          |                  |                          |
| Shift work                   | 1.15 [1.09-1.21] | $6.83 \times 10^{-8}$    | 1.32 [1.25-1.39] | $1.16 \times 10^{-26}$   | 1.23 [1.17-1.30] | $1.51 \times 10^{-15}$ * | 1.13 [1.07-1.19] | $5.54 \times 10^{-6}$ *  |
| Night shifts                 | 1.11 [1.03-1.20] | $6.20 \times 10^{-3}$    | 1.37 [1.27-1.48] | $3.56 \times 10^{-15}$   | 1.26 [1.16-1.36] | $1.22 \times 10^{-8}$ *  | 1.15 [1.06-1.24] | $7.00 \times 10^{-4}$ *  |
| Heavy manual work            | 1.21 [1.16-1.26] | $1.21 \times 10^{-17}$ * | 1.36 [1.30-1.42] | $7.30 \times 10^{-43}$ * | 1.34 [1.28-1.40] | $2.95 \times 10^{-38}$ * | 1.20 [1.14-1.27] | $5.54 \times 10^{-13}$ * |
| Non-sedentary work           | 1.26 [1.22-1.30] | $5.30 \times 10^{-46}$ * | 1.24 [1.20-1.28] | $4.96 \times 10^{-38}$ * | 1.24 [1.20-1.28] | $2.87 \times 10^{-37}$ * | 1.15 [1.10-1.19] | $1.27 \times 10^{-12}$ * |
| <b>Males</b>                 |                  |                          |                  |                          |                  |                          |                  |                          |
| Shift work                   | 1.19 [1.11-1.28] | $3.64 \times 10^{-6}$    | 1.38 [1.28-1.49] | $2.78 \times 10^{-17}$   | 1.31 [1.22-1.42] | $2.82 \times 10^{-12}$   | 1.20 [1.11-1.30] | $3.77 \times 10^{-6}$    |
| Night shifts                 | 1.16 [1.04-1.29] | $5.85 \times 10^{-3}$    | 1.39 [1.25-1.55] | $2.65 \times 10^{-9}$    | 1.31 [1.17-1.46] | $1.35 \times 10^{-6}$    | 1.19 [1.07-1.33] | $1.78 \times 10^{-3}$    |
| Heavy manual work            | 1.35 [1.27-1.44] | $8.48 \times 10^{-23}$   | 1.43 [1.34-1.52] | $3.35 \times 10^{-30}$   | 1.42 [1.34-1.51] | $4.80 \times 10^{-29}$   | 1.21 [1.12-1.30] | $2.94 \times 10^{-7}$    |
| Non-sedentary work           | 1.41 [1.34-1.49] | $1.00 \times 10^{-40}$   | 1.39 [1.32-1.46] | $1.57 \times 10^{-36}$   | 1.39 [1.32-1.46] | $4.00 \times 10^{-36}$   | 1.26 [1.19-1.34] | $7.61 \times 10^{-14}$   |
| <b>Females</b>               |                  |                          |                  |                          |                  |                          |                  |                          |
| Shift work                   | 1.17 [1.09-1.25] | $4.84 \times 10^{-6}$    | 1.25 [1.17-1.34] | $1.15 \times 10^{-10}$   | 1.16 [1.08-1.24] | $3.00 \times 10^{-5}$    | 1.08 [1.00-1.16] | 0.04                     |
| Night shifts                 | 1.20 [1.07-1.34] | $1.35 \times 10^{-3}$    | 1.32 [1.18-1.48] | $1.64 \times 10^{-6}$    | 1.18 [1.06-1.33] | $4.03 \times 10^{-3}$    | 1.09 [0.97-1.23] | 0.15                     |
| Heavy manual work            | 1.22 [1.15-1.30] | $3.33 \times 10^{-10}$   | 1.29 [1.21-1.37] | $4.64 \times 10^{-15}$   | 1.26 [1.18-1.34] | $3.19 \times 10^{-12}$   | 1.17 [1.09-1.26] | $1.42 \times 10^{-5}$    |
| Non-sedentary work           | 1.18 [1.14-1.23] | $2.16 \times 10^{-15}$   | 1.15 [1.10-1.19] | $3.68 \times 10^{-10}$   | 1.14 [1.10-1.19] | $7.26 \times 10^{-10}$   | 1.08 [1.03-1.14] | $1.07 \times 10^{-3}$    |

Adjusted accordingly: Model 1 – unadjusted, Model 2 – age and sex, Model 3 – age, sex, BMI and TDI, Model 4 – age, sex, BMI, TDI and other employment factors.

\* Denotes a sex interaction term with P-value <0.1.
